# Supplementary material for: Language Delay and Externalizing Problems in Preschool Age: A Prospective Cohort Study
Source: Springer Nature journal article supplement (doi:10.1007/s10802-017-0391-5), 2018-01-10
Supplement: MOESM1 [file 15356244]

**Aggression (items included at all time points)**

1. Defiant
2. Hits others
3. Gets in many fights

**Inattention (items included at all time points)**

1. Can’t concentrate, can’t pay attention for long
2. Can’t sit still, restless or hyperactive
3. Quickly shifts from one activity to another

**Language (1.5 yrs)**

1. When you ask him/her, does your child go into another room to find a familiar toy or object? (When you ask, for instance: “Whereʼs your ball?”, “Go and get your coat” or “Go and get your blanket”)
2. Does your child say eight or more words, in addition to “mamma” and “dadda”?
3. Without showing him/her first, does your child point to the correct picture when you say “Show me the cat” or “Where is the dog”?

**Language (3 yrs)**

1. Without showing him/her first, does your child point to the correct picture when you say, “Where is the cat” or “Where is the dog”? Your child must only point at the correct picture
2. When you ask your child to point at his/her eyes, nose, hair, feet, ears, etc., does he/she point correctly at least seven parts of the body? (The child can point at himself/herself, you or a doll.)
3. Does your child use sentences made up of three or four words?
4. Without giving him/her help by pointing or using gestures, ask your child to “Put the shoe on the table” and “Put the book under the chair”. Does your child carry out both of these directions correctly?
5. When looking at a picture book, does your child tell you what is happening or what action is taking place in the picture? (For example, “Barking”, “Running”, “Eating” and “Crying”?) You may ask, “What is the dog (or boy) doing?”
6. Can your child tell you at least two things about an object he/she is familiar with? If you say, for example, “Tell me about your ball”, will your child answer by saying something like “It is round, I can throw it, it is big”?

**Language (5 yrs)**

1. Without giving your child help by pointing or repeating directions, does you child follow three directions that are unrelated to one another? Give all three directions before your child starts. For example, you may ask your child to ”Clap your hands, walk to the door, and sit down,” or “Give me the pen, open the book, and stand up.”
2. Does your child use sentences made up of three or four words?
3. When talking about something that already happened, does your child use words that end in “ed,” such as walked, or played? Ask your child questions , such as “How did you get to the store?” (“We walked.”) “What did you do at your friend’s house?” (“We played.”)
4. Does your child use comparison words, such as heavier, stronger, or shorter? Ask your child questions, such as “A car is big, but a bus is_____” (bigger); “A cat is heavy, but a man is _____” (heavier); “A TV is small, but a book is _____” (smaller).
5. Does your child answer the following questions: 1. “What do you do when you are hungry?” (Acceptable answers include: “Get food,” “Eat,” “Ask for something to eat,” and “Have a snack.”) 2. “What do you do when you are tired?” (Acceptable answers include: “Take a nap,” “Rest,” “Go to sleep,” “Go to bed,” “Lie down” and “Sit down.”)
6. Does your child repeat the sentences shown below back to you, without any mistakes? You may repeat each sentence one time. Mark “yes” if your child repeats both sentences without mistakes or “sometimes” if your child repeats one sentence without mistakes. Jane hides her shoes for Maria to find. Al read the blue book under his bed.

**Table 4** Summary of fitted model coefficients for the causal associations between symptoms of language delay and inattention, AIC values, and model goodness of fit indices (95th percentile cut off)

|  | ***B (s.e.)*** | ***p*** | ***Δχ2*** | ***Δdf*** | ***sig*** | ***ΔAIC*** | **RMSEA** | **CFI** |
| --- | --- | --- | --- | --- | --- | --- | --- | --- |
| Step 1 |  |  |  |  |  |  |  |  |
| B1 | -0.054 (.145) | .709 |  |  |  |  | .006 | .996 |
| B2 | -0.002 (.147) | .987 |  |  |  |  |  |  |
| Step 2 |  |  |  |  |  |  |  |  |
| B1 | -0.047 (.097) | .625 | 0.013 | 1 | .910 | -1.987 | .005 | .996 |
| Step 3 |  |  |  |  |  |  |  |  |
| B2 | 0.056 (.098) | .569 | 0.132 | 1 | .716 | -1.868 | .005 | .996 |

B1=Effect of language delay on inattention adjusted for age and gender; B2= Effect of inattention on language delay adjusted for age and gender

Other estimates from the best fitting model: Variance for the time invariant factor for language= .457, p= .000; variance for the time dynamic factor for inattention=.210, p = .280; covariance between language delay and inattention at 1.5 years of age (C1) = -.046, p = .397; covariance between time dynamic factors of language delay and inattention at 3 years of age (C2) = .026, p = 717; covariance between time dynamic factors of language delay and inattention at 5 years of age (C3) = .222, p = .004, covariance between time invariant factors of language delay and inattention (I) = .182, p = .000, regression coefficient for language delay at 1 ½ on language delay at 3 years of age (B4) = -0.047, p = .331, regression coefficient for language delay at 3 on language delay at 5 years of age (B3) =.240, p = .000, regression coefficient for inattention at 1 ½ on inattention at 3 years of age (B5) = .338, p = .076, regression coefficient for inattention at 3 on inattention at 5 years of age (B6) = .449, p = .108

**Table 5** Summary of fitted model coefficients for the causal associations between symptoms of language delay and aggression, AIC values, and model goodness of fit indices (95th percentile cut off)

|  | ***B (s.e.)*** | ***p*** | ***Δχ2*** | ***Δdf*** | ***sig*** | ***ΔAIC*** | **RMSEA** | **CFI** |
| --- | --- | --- | --- | --- | --- | --- | --- | --- |
| Step 1 |  |  |  |  |  |  |  |  |
| B1 | 0.158 (.072) | .029 |  |  |  |  | .006 | .996 |
| B2 | 0.020 (.101) | .847 |  |  |  |  |  |  |
| Step 2 |  |  |  |  |  |  |  |  |
| B1 | 0.149 (.065) | .022 | 0.053 | 1 | .918 | -1.947 | .005 | .996 |
| Step 3 |  |  |  |  |  |  |  |  |
| B2 | -0.129 (.095) | .174 | 4.672 | 1 | .031 | 2.672 | .005 | .996 |

B1=Effect of language delay on aggression adjusted for age and gender; B2= Effect of aggression on language delay adjusted for age and gender

Other estimates from the best fitting model: Variance for the time invariant factor for language= .463, p= .000; variance for the time invariant factor for aggression=.220, p = .001; covariance between language delay and aggression at 1.5 years of age (C1) =.011, p = .823 ; covariance between time dynamic factors of language delay and aggression at 3 years of age (C2) = -.077, p = 147; covariance between time dynamic factors of language delay and aggression at 5 years of age (C3) = .042, p = .503, covariance between time invariant factors of language delay and aggression (I) = .041, p = .210, regression coefficient for language delay at 1 ½ on language delay at 3 years of age (B4) = .144, p = .012, regression coefficient for language delay at 3 on language delay at 5 years of age (B3) = .241, p = .000, regression coefficient for aggression at 1 ½ on aggression at 3 years of age (B5) = .144, p = .046, regression coefficient for aggression at 3 on aggression at 5 years of age (B6) = .258, p = .000
